# Supplementary material for: Toward smart CO 2 capture by the synthesis of metal organic frameworks using large language models
Source: Royal Society of Chemistry journal article supplement (doi:10.1039/d5dd00446b), 2025-12-11
Supplement: d5dd00446b2.xlsx [file d5dd00446b2.xlsx]

## Sheet: evaluate ChatGPT results
Type (ChatGPT)	CO2 adsorption capacity (ChatGPT)	CO2 adsorption amount (ChatGPT)	Type (Real)	CO2 adsorption (Real)	Filename	Description by Human reviewer	Status
ZnMOF-1	NAN	10.76 mmolg-1	ZnMOF-1	NAN	033.pdf	adsorption is not reported in the article but GPT returned value	FALSE
ZnMOF-2	NAN	7.39 mmolg-1	ZnMOF-2	NAN	033.pdf	adsorption is not reported in the article but GPT returned value	FALSE
CMOF 1	NAN	38.6 cm3/g	CMOF 1	38.6 cm3 g−1	050.pdf		TRUE
UTSA-16	NAN	160 cm3cm-3	UTSA-16	160 cm3 cm-3	059.pdf		TRUE
{[Sr(BDPO)0.5(H2O)]/C12H2O}n(1)	68.3 cm^3/g at 298 K	98.1 cm^3/g at 273 K	Sr-MOF, {[Sr(BDPO)0.5(H2O)]2H2O}n	68.3 cm^3/g (298 K) | 98.1 cm^3/g (273 K)	062.pdf	values are correct but names are different	TRUE
{[(CH3)2NH2+]2[Zn3((¼3-O))(L)2(H2O)] ·4DMF ·2H2O}n(1)	NAN	67.6 cm3/g (273 K), 32.0 cm3/g (298 K)	{[(CH3)2NH2+]2[Zn3- ((μ3-O))(L)2(H2O)]·4DMF·2H2O}n	67.6 cm3 g−1 (273 K) | 32.0 cm3 g−1 (298 K)	067.pdf	extra character in name	TRUE
(Me2NH2)[In(SBA)2]	0.8 mmol/g	0.8 mmol/g	(Me2NH2)[In(SBA)2]	0.8 mmol/g	075.pdf		TRUE
(Me2NH2)[In(SBA)(BDC)]	0.78 mmol/g	0.78 mmol/g	(Me2NH2)[In(SBA)(BDC)]	0.78 mmol/g	075.pdf		TRUE
(Me2NH2)[In(SBA)(BDC-NH2)]	0.37 mmol/g	0.37 mmol/g	(Me2NH2)[In(SBA)(BDC-NH2)]	0.37 mmol/g	075.pdf		TRUE
(NH4)3[In3Cl2(BPDC)5]	NAN	NAN	(NH4)3[In3Cl2(BPDC)5]	NAN	075.pdf	adsorption is not reported in the article	TRUE
GrO@MIL-101	NAN	22.4 mmol g-1	GrO@MIL-101	22.4 mmol/g	092.pdf		TRUE
macro-meso-Cu-BDC	NAN	49.51 cm3/g	Macroporous-Mesoporous MOF	49.51 cm3/g	103.pdf	extra character in name	TRUE
CPM-200-Fe/Mg	NAN	207.6 cm³/g (9.27 mmol/g)	CPM-200-Fe/Mg	207.6 cm3 g−1 (9.27 mmol/g)	112.pdf		TRUE
CPM-200-In/Mg	NAN	190.8 cm³/g (8.52 mmol/g)	CPM-200-In/Mg	190.8 cm3 g−1 (8.52 mmol/g)	112.pdf		TRUE
CPM-200-V/Mg	NAN	155.4 cm³/g (6.94 mmol/g)	CPM-200-V/Mg	155.4 cm3 g−1 (6.94 mmol/g)	112.pdf		TRUE
CPM-200-In/Co	NAN	136.9 cm³/g (6.11 mmol/g)	CPM-200-In/Co	136.9 cm3 g−1 (6.11 mmol/g)	112.pdf		TRUE
CPM-200-Ga/Mg	NAN	136.2 cm³/g (6.08 mmol/g)	CPM-200-Ga/Mg	136.2 cm3 g−1 (6.08 mmol/g)	112.pdf		TRUE
Zn4(pydc)4(DMF)2·3DMF	NAN	58.946	Zn4(pydc)4(DMF)2·3DMF	58.946 mL/g	113.pdf	couldn't find the unit	TRUE
Zn2(pydc)2(DEF)	NAN	NAN	Zn2(pydc)2(DEF)-MeOH	12.7445 mL/g	113.pdf	adsorption is reported but GPT returned NAN value	FALSE
MOF-69C	NAN	NAN	MOF-69C	NAN	113.pdf	adsorption is not reported in the article	TRUE
UiO-66	NAN	4 mmol/g	UiO-66(Zr/Ti)-56wt%Ti(IV)	4 mmol/g	115.pdf		TRUE
H3[(Cu4Cl)3(BTTri)8]	3.24 mmol/g (14.3 wt %)	90 wt %	H3[(Cu4Cl)3-(BTTri)8]	3.24 mmol/g (14.3 wt %)	121.pdf		TRUE
1-en	NAN	1.27 mmol/g (5.5 wt %)	ethylenediamine functionalized H3[(Cu4Cl)3-(BTTri)8]	1.27 mmol/g (5.5 wt %)	121.pdf	GPT couldn't find the complete name	TRUE
IRMOF-74-III	0.8 mmol/g	3.2 mmol/g	IRMOF-74-III-CH2NH2	3.2 mmol/g at 800 Torr	125.pdf	GPT couldn't find the complete name	TRUE
IRMOF-74-III-CH2NH2	0.8 mmol/g	0.8 mmol/g	IRMOF-74-III-CH2NH2	0.8 mmol/g	125.pdf		TRUE
SMT-1-DMA	2.32 mmol g-1	52 cm3g-1	SMT-1	52 cm3/g (2.32 mmol/g) at 196 k	136.pdf	extra character in name	TRUE
SMT-2-DMA	1.11 mmol g-1	25 cm3g-1	SMT-2	25 cm3/g (1.11 mmol/g) at 273 K	136.pdf	extra character in name	TRUE
PCN-88	7.14 mmol g-1	160 cm3g-1	PCN-88	160 cm3/g (7.14 mmol/g) at 273k	136.pdf		TRUE
PCN-880	5.31 mmol g-1	119 cm3g-1	PCN-88'	119 cm3/g (5.31 mmol/g) at 273k	136.pdf	GPT couldn't find the complete name	TRUE
Co(II)14-MOC	NAN	27 cm³/g	Co(II)14-MOC	NAN	141.pdf	adsorption is not reported in the article but GPT returned value	FALSE
IFP-8	NAN	NAN	IFP-8	27 cm3/g	141.pdf	adsorption is reported but GPT returned NAN value	FALSE
(Me2NH2)6[In10(TTCA)12]·24DMF·15H2O	4.69 mmol g-1	105.2 cm3g-1	(Me2NH2)6[In10(TTCA)12]·24DMF·15H2O	105.2 cm3/g (4.69 mmol/g) at 273 K	148.pdf		TRUE
{[Zn2.66O0.66(L)2]·2H2O}n(1)	1.440 mmol/g	32.281 cm3/g	{[Zn2.66O0.66(L)2]·2H2O}n	32.281 cm3/g (1.440 mmol/g)	149.pdf	extra character in name	TRUE
NOTT-125	9.09 mmol/g at 273 K	40.1 wt% at 273 K, 18.19 wt% at 298 K	NOTT-125a	9.09 mmol/g at 273k	156.pdf	extra character in name	TRUE
Pb-DDQ	NAN	NAN	Zn-DDQ	75 cm3/g	158.pdf		TRUE
Zn-DDQ	12.8 wt %	75 cm3/g STP	Cu-DDQ	180 cm3/g	158.pdf		TRUE
Cu-DDQ	26.1 wt %	180 cm3/g STP	Pb-DDQ	NAN	158.pdf	adsorption is not reported in the article but GPT returned value	FALSE
[Fe2(BPEB)3]	40.5 wt%	220 cm³(STP) per g	Fe2(BPEB)3	220 cm3/g at 298k and 10 bar	170.pdf		TRUE
[Ni(BPEB)]	51.0 wt%	260 cm³(STP) per g	Ni(BPEB)	260 cm3/g at 195k and 1 bar	170.pdf		TRUE
a-[Zn(BPEB)]	49.7 wt%	254 cm³(STP) per g	a-[Zn(BPEB)]	254 cm3/g at 195k and 1 bar	170.pdf	GPT found value mentioned in the table	TRUE
b-[Zn(BPEB)]	NAN	NAN	b-[Zn(BPEB)]	NAN	170.pdf	adsorption is not reported in the article	TRUE
[Zn(atz)2] (MAF-66)	6.26 mmol/g	140 cm(STP)/g at 273 K	[Zn(atz)2] (MAF-66)	6.26 mmol/g at 273 K and 1 atm	176.pdf		TRUE
SIFSIX-3-Cu	NAN	1.24 mmol g-1	SIFSIX-3-Cu	1.24 mmol/g at 20c and 400 ppm	181.pdf		TRUE
dmpn-Mg2(dobpdc)	NAN	2.7 mmol g-1	dmpn-Mg2(dobpdc)	2.7 mmol/g anhydrous CO2	181.pdf		TRUE
5A@ZIF-8	NAN	NAN	5A@ZIF-8	NAN	181.pdf	adsorption is not reported in the article	TRUE
Au/UiO-66-NH2/Graphene	NAN	49.9 mmol	Au/UiO-66-NH2/GR	NAN	195.pdf	adsorption is not reported in the article but GPT returned value	FALSE
Co-MOF-74(M)	288 mg g-1	288 mg g-1	Co-MOF-74(M)	288mg/g at 25 ◦C and 1 bar	197.pdf		TRUE
Co-MOF-74(S)	288 mg g-1	NAN	Co-MOF-74(S)	288mg/g at 25 ◦C and 1 bar	197.pdf		TRUE
MIL-101 (Cr)	3.81	2.11	MIL-101 (Cr)	3.81 mmol/g at 348k	209.pdf	couldn't find the unit	TRUE
Mg-MOF-74	NAN	8.6	Mg-MOF-74	8.6 mmol/g	209.pdf	couldn't find the unit	TRUE
ZIF-8	360	NAN	ZIF-8-90	NAN	209.pdf	adsorption is not reported in the article but GPT returned value	FALSE
Zr-MOF-801	30.3	NAN	MOF-801 incorporated PEBA MM	30.3	209.pdf	GPT returned wrong name	TRUE
M@COF-0.05	NAN	4.53 mmol·g-1	M@COF-0.05	4.53 mmol/g at 1 bar	210.pdf		TRUE
M@COF-0.10	NAN	4.04 mmol·g-1	M@COF-0.10	4.04	210.pdf	GPT found the unit from table head	TRUE
M@COF-0.15	NAN	3.36 mmol·g-1	M@COF-0.15	3.36	210.pdf	GPT found the unit from table head	TRUE
M@COF-0.15-Br	NAN	NAN	M@COF-0.15-Br	NAN	210.pdf	adsorption is not reported in the article	TRUE
MOF-5-MIX	49.3 cm3/g	0.58 mmol/g	MOF-5-NH2	56.8 cm3/g at 298k	218.pdf		TRUE
MOF-5	29.6 cm3/g	0.0296 mmol/g	MOF-5-MIX	49.3 cm3/g at 298k	218.pdf		TRUE
MOF-5-NH2	56.8 cm3/g	0.060 mmol/g	MOF-5	29.6 cm3/g at 298k	218.pdf		TRUE
MOF-5-OH	21.2 cm3/g	0.0212 mmol/g	MOF-5-OH	21.2 cm3/g at 298k	218.pdf		TRUE
UiO-66(Zr)-(OH)2	6.23 mmol/g	6.23 mmol/g	UiO-66(Zr)-(OH)2	6.23 mmol/g	223.pdf		TRUE
MOF-177	33.5 mmol/g	1.12 mmol/g	MOF-177	33.5 mmol/g at room temp and 45bar	248.pdf		TRUE
MOF-177-TEPA-20%	NAN	4.6 mmol/g	MOF-177-TEPA-20%	4.6 mmol/g at 328k	248.pdf		TRUE
Mg2(dobdc)	6.1 mmol/g	NAN	Mg2(dobdc)	6.1 mmol/g at 25c and 150mbar	249.pdf		TRUE
Mg-MOF-74	5.10 mmol/g	21.5 mg/g	Mg-MOF-74	8 mmol/g	249.pdf	GPT returned wrong value	FALSE
MIL-101(Cr)	1.22 mmol/g	20.4 mg/g	MIL-101(Cr)	1.22	249.pdf	GPT found value and unit mentioned in the table	TRUE
NvOFFIVE-1-Ni	2.5 mmol/g	1.3 mmol/g	NbOFFIVE-1-Ni	1.3 mmol/g	249.pdf	GPT returned wrong name	TRUE
[Zn2(NH2BDC)2(dpNDI)]n	NAN	1.51 mmol/g at 273K, 1.26 mmol/g at 298K	[Zn2(NH2BDC)2(dpNDI)]n	1.51 mmol/g at 273K, 1.26 mmol/g at 298K	274.pdf		TRUE
Mg2(dobpdc)	3.3 mmol/g	NAN	Mg2(dobpdc)(3-4-3)	3.3	287.pdf	GPT found value mentioned in the table	TRUE
MOF-808	2.45 mmol/g	2.8	MOF-808	0.702 mmol/g	287.pdf	GPT returned wrong value	FALSE
MIL-101(Cr)-NH2	NAN	3.02 mmol/g	MIL-101(Cr)-NH2	3.02 mmol/g	304.pdf		TRUE
MIL-101(Cr)-I	NAN	NAN	MIL-101(Cr)-I	1.85 mmol/g	304.pdf	mentioned in the table but GPT returned NAN value	FALSE
MIL-101(Cr)-F	NAN	NAN	MIL-101(Cr)-F	2.24 mmol/g	304.pdf	mentioned in the table but GPT returned NAN value	FALSE
MIL-101(Cr)-azo	NAN	NAN	MIL-101(Cr)-azo	1.66 mmol/g	304.pdf	mentioned in the table but GPT returned NAN value	FALSE
dmen-Mg2(dobpdc)	13.3 wt%	13.3 wt%	Mg2-(dobpdc)	13.3 wt%	316.pdf	extra character in name	TRUE
Ni-MOFs	NAN	NAN	Ni-MOFs	NaN	333.pdf	adsorption is not reported in the article	TRUE
Ni@C	NAN	15 cm3/g	Ni@C	15 cm3/g	333.pdf		TRUE
polyILs@MIL-101	103 cm3/g at 273 K	62 cm3/g at 298 K	polyILs@MIL-101	62 cm3/g at 298 K and 103 cm3/g at 273 K and 1bar	368.pdf	found both values at 2 different temperature	TRUE
1	NAN	53.78 cm3/g	{[Co(L)]·DMF·2H2O}n	53.78 cm3/g at 273 K	373.pdf	GPT returned wrong name	TRUE
HHU-5	37.1 wt %	188.8 cm3gâˆ’1 at 273 K	HHU-5	37.1 wt % at 1 bar and 273 K	389.pdf		TRUE
MIL-53(Al)	3.67 mmol/g	3.67 mmol/g (0 °C), 2.10 mmol/g (25 °C)	MIL-53(Al)-SY-I	3.67 mmol/g	399.pdf	GPT returned incomplete name	TRUE
PNU-21	NAN	0.26 cm^3/g	PNU-21	0.26 cm3/g	403.pdf		TRUE
PNU-22	NAN	1.4 cm^3/g	PNU-22	1.4 cm3/g	403.pdf		TRUE
ZnF(TZ)	NAN	40 cm3STPcm-3 (1.8 mmol cm-3)	ZnF(daTZ)	40 cm3STP cm3 (1.8 mmol/cm3)	416.pdf		TRUE
ZnF(aTZ)	NAN	NAN	ZnF(aTZ)	NAN	416.pdf		TRUE
ZnF(daTZ)	NAN	40 cm3STPcm-3 (1.8 mmol cm-3)	ZnF(TZ)	NAN	416.pdf	adsorption is not reported in the article but GPT returned value	FALSE
HKUST-1	NAN	4.1 mmol/g	HKUST-1	4.1 mmol/g	423.pdf		TRUE
HKUST-1-5ED	NAN	2.4 mmol/g	HKUST-1−5ED	2.4 mmol/g	423.pdf		TRUE
HKUST-1-10ED	NAN	2.1 mmol/g	HKUST-1−10ED	NAN	423.pdf	adsorption is not reported in the article but GPT returned value	FALSE
HKUST-1-20ED	NAN	NAN	HKUST-1−20ED	2.1 mmol/g	423.pdf	adsorption is reported in the article but GPT returned NAN value	FALSE
MIL-101-Cr	3.05 mmol·g-1	NAN	MIL-101-Cr	3.05 mmol/g	427.pdf		TRUE
MIL-101-SO3H	2.04 mmol·g-1	NAN	MIL-101-SO3H	2.04 mmol/g	427.pdf		TRUE
MIL-101-EN	3.57 mmol·g-1	NAN	MIL-101-EN	3.57 mmol/g	427.pdf		TRUE
MIL-101-DETA	NAN	NAN	MIL-101-DETA	NaN	427.pdf	adsorption is not reported in the article	TRUE
MIL-101-TETA	NAN	NAN	MIL-101-TETA	NaN	427.pdf	adsorption is not reported in the article	TRUE
